# Supplementary material for: Central Tethyan platform-top hypoxia during Oceanic Anoxic Event 1a
Source: Copernicus journal article supplement (doi:10.5194/cp-2019-3), 2019-01-25
Supplement: Supplementary file 1 [file cp-2019-3-supplement.zip]

**Table S1.** Redox sensitive trace elements arsenic, vanadium and molybdenum (ppm). Every sample was measured 6 times (2 spots, 3 measurements each) by LA-ICP-MS. The mean values were calculated. (This data is shown in Fig. 4).

| Sample No. | As mean (ppm) | V mean (ppm) | Mo mean (ppm) |
|------------|---------------|--------------|---------------|
| KAN 8.25   | 0.730         | 7.973        | 3.485         |
| KAN 11.0   | 1.502         | 7.812        | 4.353         |
| KAN 11.9   | 2.200         | 19.491       | 1.789         |
| KAN 12.8   | 2.300         | NA           | 7.162         |
| KAN 13.2   | 3.246         | 17.604       | 4.497         |
| KAN 14.2   | 0.500         | 7.856        | 0.511         |
| KAN 15.4   | 0.404         | 7.327        | 0.707         |
| KAN 16.3   | 0.620         | 10.911       | 0.813         |
| KAN 16.6   | 1.354         | 16.061       | 2.300         |
| KAN 16.85  | 1.114         | 9.237        | 0.940         |
| KAN 18.7   | 0.846         | 8.694        | 0.890         |
| KAN 19.0   | 1.908         | 7.325        | 1.401         |
| KAN 19.3   | 0.739         | 6.537        | 0.922         |
| KAN 20.0   | 0.772         | 7.412        | 0.943         |
| KAN 20.3   | 0.487         | 8.640        | 0.554         |
| KAN 20.8   | 0.494         | 8.381        | 0.568         |
| KAN 21.2   | 0.347         | 3.269        | 0.739         |
| KAN 21.85  | 0.537         | 5.980        | 0.709         |
| KAN 22.4   | 0.500         | 5.651        | 0.527         |
| KAN 22.7   | 0.661         | 14.543       | 2.656         |
| KAN 23.3   | 0.799         | 15.898       | 3.663         |
| KAN 23.6   | 0.492         | 12.632       | 2.429         |
| KAN 23.9   | 0.886         | 11.636       | 3.761         |
| KAN 24.2   | 1.580         | NA           | NA            |
| KAN 24.8   | NA            | 11.120       | 0.806         |
| KAN 25.2   | 0.773         | 6.725        | 1.601         |
| KAN 25.5   | 1.176         | 4.734        | NA            |
| KAN 26.4   | 0.841         | 11.357       | 1.085         |
| KAN 26.6   | 1.352         | 11.378       | 2.474         |
| KAN 27.0   | 0.146         | NA           | NA            |
| KAN 27.6   | 0.300         | 2.943        | 0.183         |

|          |       |        |       |
|----------|-------|--------|-------|
| KAN 27.9 | 0.173 | 3.248  | 0.195 |
| KAN 29.4 | 0.074 | NA     | 0.130 |
| KAN 30.8 | 0.361 | 11.558 | 1.039 |

**Table S2.** Rare Earth Elements cerium, lanthanum and praseodymium (ppm) and Ce anomalies. REEs and redox sensitive trace elements were measured using LA-ICP-MS. Ce anomalies were defined following Nozaki's calculation (2008):  $Ce/Ce^* = 2Ce_N / (La_N + Pr_N)$ . (This data is shown in Fig. 5).

| Sample    | Ce mean (ppm) | La mean (ppm) | Pr mean (ppm) | Ce/Ce* |
|-----------|---------------|---------------|---------------|--------|
| KAN 12,8  | 0.015         | 0.031         | 0.016         | 0.642  |
| KAN 13,2  | 0.013         | 0.040         | 0.019         | 0.423  |
| KAN 14,2  | 0.004         | 0.014         | 0.005         | 0.408  |
| KAN 15,4  | 0.005         | 0.017         | 0.007         | 0.400  |
| KAN 16,3  | 0.010         | 0.033         | 0.016         | 0.422  |
| KAN 16,6  | 0.012         | 0.032         | 0.016         | 0.522  |
| KAN 16,85 | 0.011         | 0.029         | 0.019         | 0.445  |
| KAN 20,8  | 0.012         | 0.023         | 0.016         | 0.588  |
| KAN 21,2  | 0.011         | 0.017         | 0.012         | 0.776  |
| KAN 21,85 | 0.008         | 0.016         | 0.010         | 0.626  |
| KAN 22,4  | 0.013         | 0.020         | 0.014         | 0.786  |
| KAN 22,7  | 0.016         | 0.020         | 0.017         | 0.876  |
| KAN 24,65 | 0.013         | 0.015         | 0.013         | 0.946  |
| KAN 24,8  | 0.020         | 0.023         | 0.020         | 0.929  |
| KAN 25,2  | 0.017         | 0.018         | 0.017         | 0.953  |
| KAN 25,5  | 0.014         | 0.018         | 0.015         | 0.868  |
| KAN 26,4  | 0.016         | 0.029         | 0.019         | 0.678  |
| KAN 26,6  | 0.014         | 0.025         | 0.014         | 0.724  |
| KAN 27,0  | 0.012         | 0.030         | 0.013         | 0.584  |
| KAN 27,6  | 0.015         | 0.048         | 0.015         | 0.471  |

**Table S3.** Uranium isotope ratios and twice the standard deviation. Uranium isotope analysis were performed using MC-ICP-MS. Results are provided in the delta-notation:  $\delta^{238}\text{U}$  in ‰ =  $[(^{238}\text{U} / ^{235}\text{U})_{\text{sample}} / (^{238}\text{U} / ^{235}\text{U})_{\text{standard}} - 1] \times 1000$ . (This data is shown in Fig. 5).

| Sample   | mean $^{238}\text{U}/^{235}\text{U}$ | 2 S.D. |
|----------|--------------------------------------|--------|
| KAN12.8  | 0.260                                | 0.06   |
| KAN13.2  | 0.439                                | 0.04   |
| KAN16.3  | 0.363                                | 0.02   |
| KAN16.6  | 0.415                                | 0.04   |
| KAN16.75 | 0.264                                | 0.03   |
| KAN19    | 0.180                                | 0.01   |
| KAN20.0  | 0.111                                | 0.04   |
| KAN20.9  | 0.092                                | 0.02   |
| KAN21.2  | 0.142                                | 0.04   |
| KAN22.4  | 0.074                                | 0.05   |
| KAN23.3  | 0.103                                | 0.16   |
| KAN23.9  | 0.154                                | 0.09   |
| KAN24.8  | 0.060                                | 0.02   |
| KAN25.5  | -0.021                               | 0.05   |
| KAN27.6  | 0.202                                | 0.05   |

**Table S4.** The Lanthanum anomaly, to test whether the Ce anomaly values are genuine or an artifact caused by elevated amounts of lanthanum. The calculation of  $\text{Pr}/\text{Pr}^*$  is given by  $2\text{Pr}_N / (\text{Ce}_N + \text{Nd}_N)$ . Calculation of  $\text{Ce}/\text{Ce}^*$  is explained in Table 2. (This data is shown in Fig. 6).

| Sample   | La<br>(ppm) | Ce<br>(ppm) | Pr<br>(ppm) | Nd<br>(ppm) | Pr*<br>(ppm) | Pr/Pr* | Ce*<br>(ppm) | Ce/Ce* |
|----------|-------------|-------------|-------------|-------------|--------------|--------|--------------|--------|
| KAN 7,2  | 0.010       | 0.010       | 0.010       | 0.011       | 0.021        | 0.961  | 0.020        | 1.016  |
| KAN 7,6  | 0.012       | 0.013       | 0.013       | 0.014       | 0.027        | 0.983  | 0.026        | 0.997  |
| KAN 8,25 | 0.013       | 0.011       | 0.012       | 0.012       | 0.023        | 1.008  | 0.025        | 0.922  |
| KAN 11,0 | 0.008       | 0.003       | 0.003       | 0.003       | 0.006        | 1.005  | 0.011        | 0.526  |
| KAN 11,9 | 0.008       | 0.003       | 0.003       | 0.003       | 0.007        | 0.955  | 0.011        | 0.573  |

|           |       |       |       |       |       |       |       |       |
|-----------|-------|-------|-------|-------|-------|-------|-------|-------|
| KAN 12,8  | 0.031 | 0.015 | 0.016 | 0.016 | 0.031 | 1.051 | 0.047 | 0.642 |
| KAN 13,2  | 0.040 | 0.013 | 0.019 | 0.021 | 0.034 | 1.156 | 0.059 | 0.423 |
| KAN 14,2  | 0.014 | 0.004 | 0.005 | 0.005 | 0.009 | 1.046 | 0.019 | 0.408 |
| KAN 15,4  | 0.017 | 0.005 | 0.007 | 0.007 | 0.012 | 1.101 | 0.024 | 0.400 |
| KAN 16,3  | 0.033 | 0.010 | 0.016 | 0.017 | 0.028 | 1.141 | 0.049 | 0.422 |
| KAN 16,6  | 0.032 | 0.012 | 0.016 | 0.017 | 0.029 | 1.077 | 0.048 | 0.522 |
| KAN 16,75 | 0.025 | 0.010 | 0.012 | 0.014 | 0.023 | 1.056 | 0.037 | 0.515 |
| KAN 16,85 | 0.029 | 0.011 | 0.019 | 0.020 | 0.031 | 1.204 | 0.048 | 0.445 |
| KAN 18,7  | 0.030 | 0.009 | 0.017 | 0.019 | 0.028 | 1.168 | 0.046 | 0.401 |
| KAN 19,0  | 0.044 | 0.010 | 0.045 | 0.049 | 0.059 | 1.542 | 0.089 | 0.218 |
| KAN 19,3  | 0.030 | 0.011 | 0.028 | 0.031 | 0.042 | 1.316 | 0.058 | 0.364 |
| KAN 20,0  | 0.037 | 0.015 | 0.035 | 0.039 | 0.054 | 1.291 | 0.072 | 0.423 |
| KAN 20,3  | 0.029 | 0.013 | 0.025 | 0.028 | 0.042 | 1.199 | 0.054 | 0.495 |
| KAN 20,8  | 0.023 | 0.012 | 0.016 | 0.018 | 0.030 | 1.104 | 0.039 | 0.588 |
| KAN 21,2  | 0.017 | 0.011 | 0.012 | 0.013 | 0.024 | 0.967 | 0.029 | 0.776 |
| KAN 21,85 | 0.016 | 0.008 | 0.010 | 0.011 | 0.026 | 1.148 | 0.026 | 0.626 |
| KAN 22,4  | 0.020 | 0.013 | 0.014 | 0.015 | 0.029 | 0.974 | 0.034 | 0.786 |
| KAN 22,7  | 0.020 | 0.016 | 0.017 | 0.017 | 0.034 | 0.997 | 0.037 | 0.876 |
| KAN 23,3  | 0.092 | 0.017 | 0.099 | 0.105 | 0.089 | 1.595 | 0.190 | 0.178 |
| KAN 23,6  | 0.085 | 0.015 | 0.075 | 0.088 | 0.103 | 1.456 | 0.160 | 0.185 |
| KAN 23,9  | 0.080 | 0.014 | 0.082 | 0.092 | 0.106 | 1.555 | 0.162 | 0.173 |
| KAN 24,2  | 0.054 | 0.017 | 0.036 | 0.042 | 0.044 | 1.169 | 0.090 | 0.373 |
| KAN 24,65 | 0.015 | 0.013 | 0.013 | 0.014 | 0.026 | 0.961 | 0.027 | 0.946 |
| KAN 24,8  | 0.023 | 0.020 | 0.020 | 0.020 | 0.024 | 0.960 | 0.043 | 0.929 |
| KAN 25,2  | 0.018 | 0.017 | 0.017 | 0.018 | 0.029 | 1.006 | 0.035 | 0.953 |
| KAN 25,5  | 0.018 | 0.014 | 0.015 | 0.015 | 0.026 | 1.035 | 0.033 | 0.868 |
| KAN 26,4  | 0.029 | 0.016 | 0.019 | 0.021 | 0.037 | 1.039 | 0.048 | 0.678 |
| KAN 26,6  | 0.025 | 0.014 | 0.014 | 0.015 | 0.029 | 0.971 | 0.039 | 0.724 |
| KAN 27,0  | 0.030 | 0.012 | 0.013 | 0.014 | 0.027 | 0.978 | 0.043 | 0.584 |
| KAN 27,6  | 0.048 | 0.015 | 0.015 | 0.017 | 0.032 | 0.963 | 0.063 | 0.471 |
| KAN 27,9  | 0.065 | 0.019 | 0.019 | 0.022 | 0.041 | 0.942 | 0.084 | 0.460 |
| KAN 29,4  | 0.043 | 0.026 | 0.027 | 0.031 | 0.056 | 0.960 | 0.070 | 0.729 |
| KAN 30,0  | 0.043 | 0.027 | 0.028 | 0.031 | 0.058 | 0.957 | 0.070 | 0.758 |
| KAN 30,8  | 0.080 | 0.053 | 0.053 | 0.059 | 0.113 | 0.939 | 0.133 | 0.805 |
| KAN 33,4  | 0.107 | 0.115 | 0.118 | 0.126 | 0.241 | 0.981 | 0.225 | 1.019 |
| KAN 34,0  | 0.089 | 0.082 | 0.096 | 0.103 | 0.186 | 1.037 | 0.185 | 0.886 |

---
